# Supplementary material
Source: Springer Nature journal article supplement (https://www.springermedizin.de/resource/supplementary/12906_2013_1759_MOESM2_ESM.pdf/9522730)

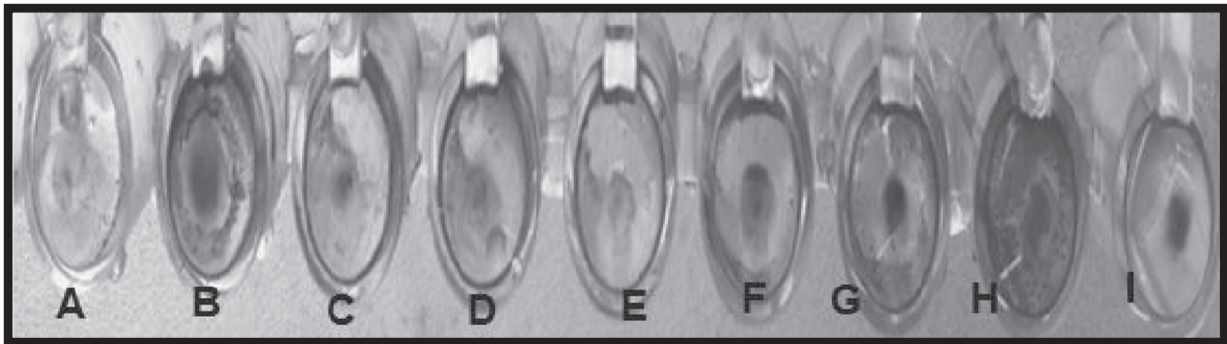

**A**

**B**

**C**

**D**

**E**

**F**

**G**

**H**

**I**

Supplement: MOESM2 [file 9522730]
